# Supplementary material for: Nanofibers with diameter below one nanometer from electrospinning
Source: PubMed Central journal article supplement (PMC9077775; doi:10.1039/c7ra13444d), 2018-01-26
Supplement: RA-008-C7RA13444D-s001.pdf [file RA-008-C7RA13444D-s001.pdf]

## Supplementary Information

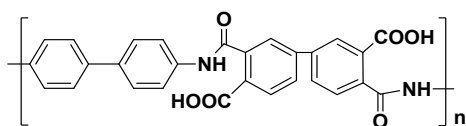

**Fig. S1** Macromolecular structure of PAA.

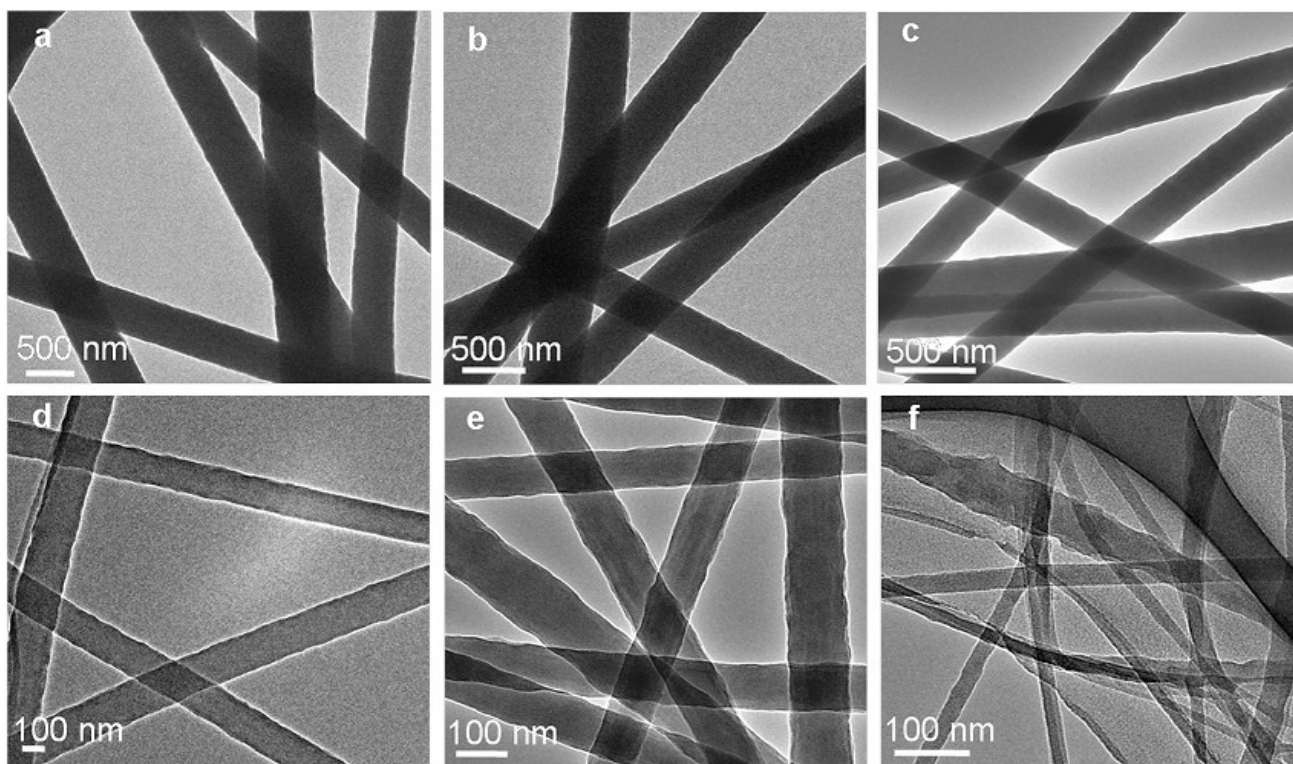

**Fig. S2** TEM images of PAA nanofibers obtained from PAA solutions of 6 wt% (a), 5 wt% (b), 4 wt% (c), 3 wt% (d), 2 wt% (e), and 1 wt% (f), respectively.

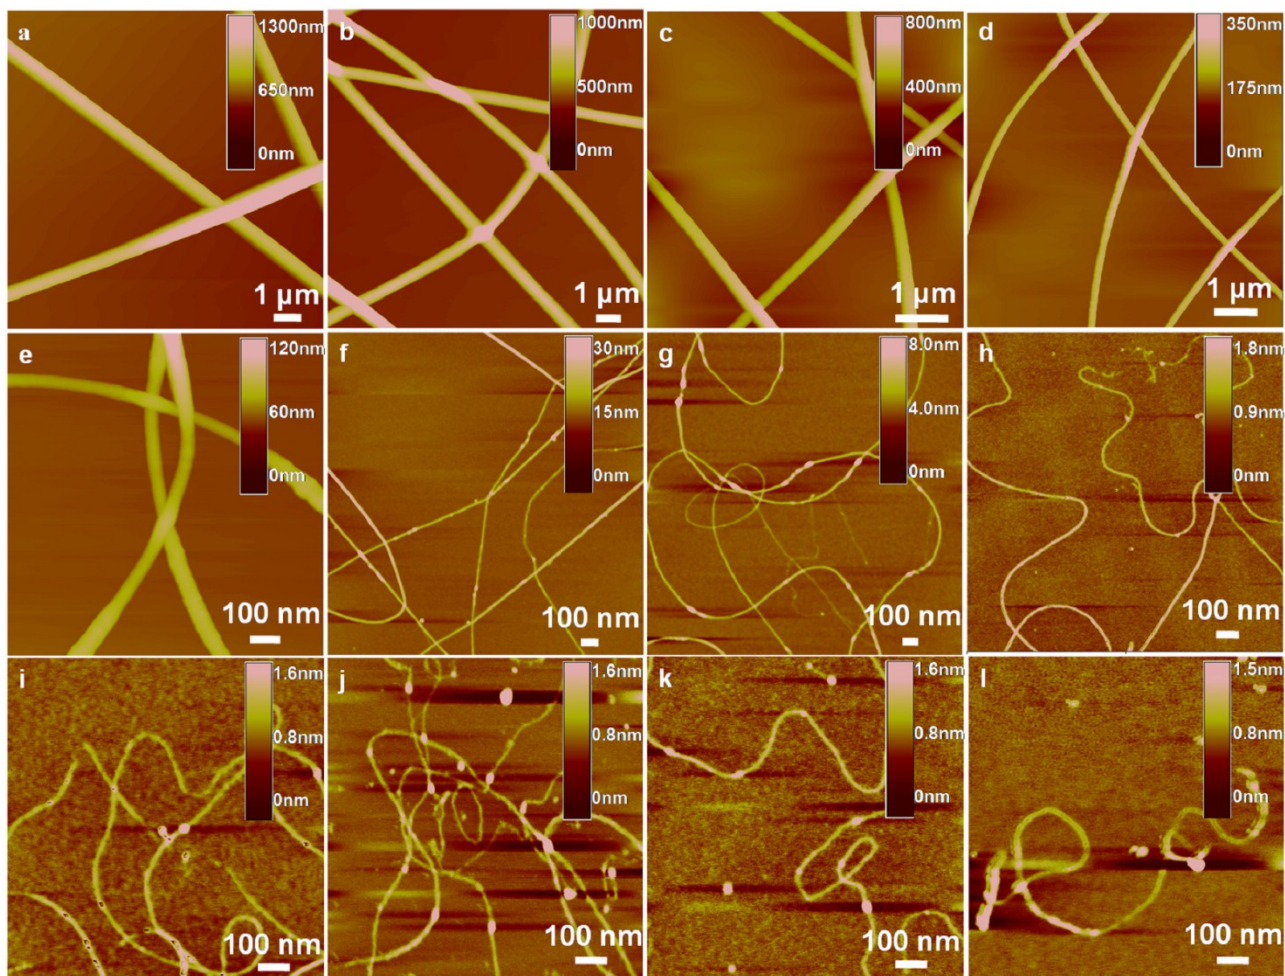

**Fig. S3** AFM height images of PAA nanofibers obtained from 5 wt% (a), 4 wt% (b), 3 wt% (c), 2 wt% (d), 1 wt% (e), 0.5 wt% (f), 0.3 wt% (g), 0.1 wt% (h), 0.06 wt% (i), 0.03 wt% (j), 0.02 wt% (k) and 0.01 wt% (l) by weight concentration from PAA solution.

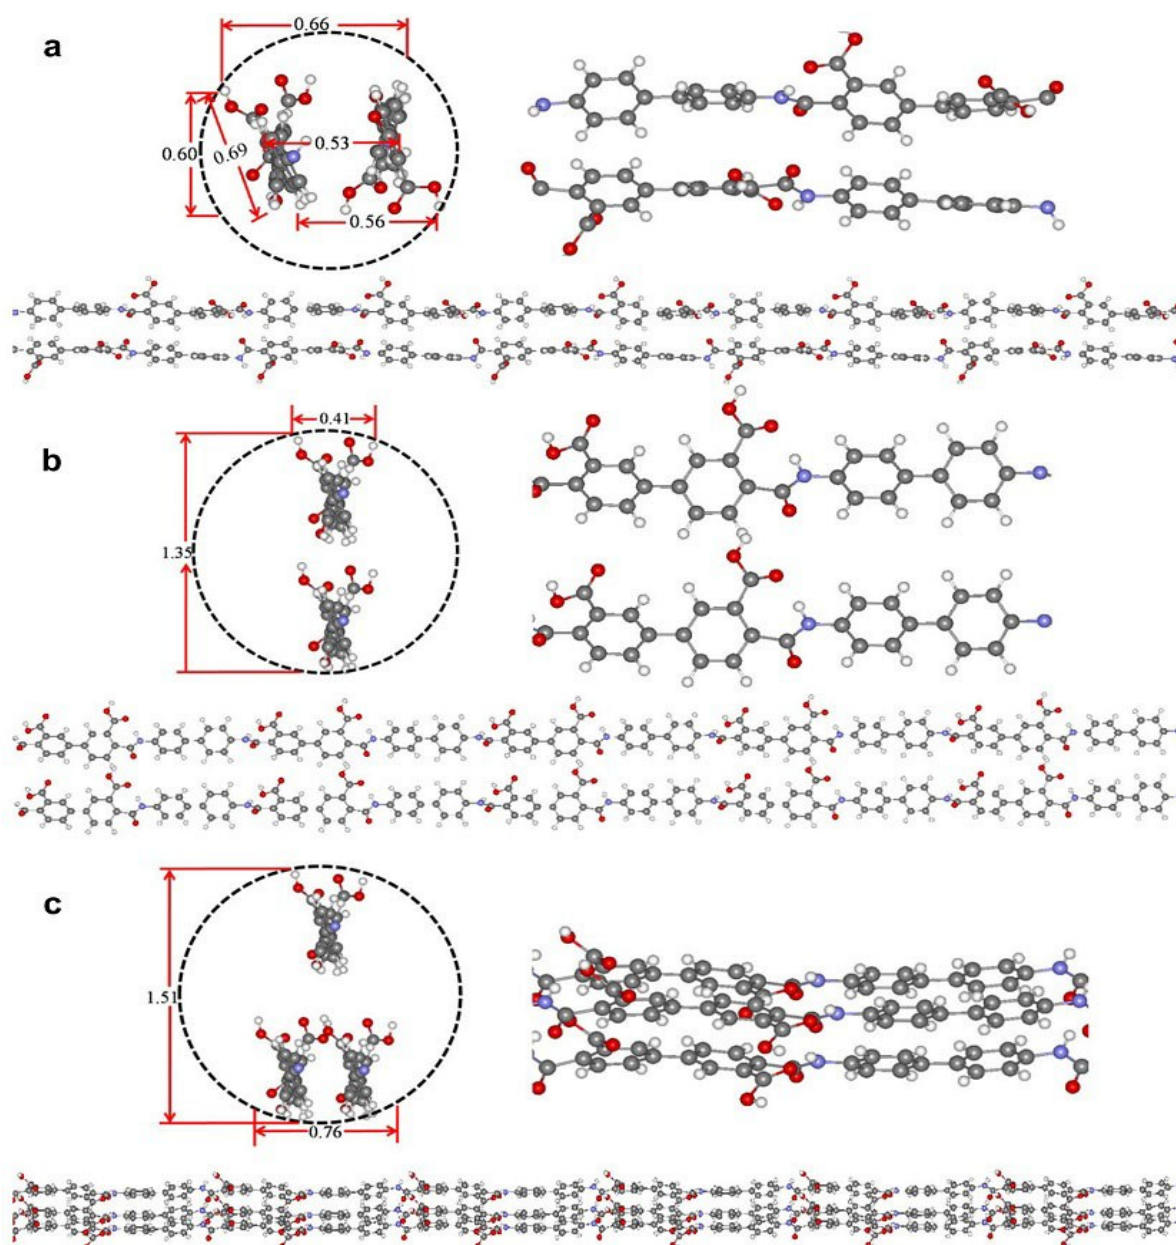

**Fig. S4** Molecular models for two (a, b) and three (c) molecules of PAA molecular chain (cross-section, side view, and molecular chain), the labelled diameters are given in nm.

**Table S1.** Average diameters of PAA nanofibers electrospun at different concentrations and physical properties of polymer solutions.

| PAA | $c/c^*$ | Diameter (nm) | Absolute | Conductivity |
|-----|---------|---------------|----------|--------------|
|-----|---------|---------------|----------|--------------|

| concentration (wt%) |       | viscosity(pa.s)  |       |                    | ( $\mu\text{s/cm}$ ) |
|---------------------|-------|------------------|-------|--------------------|----------------------|
| 6                   | 31.58 | 490 $\pm$ 60     | 73.70 | 27.0               |                      |
| 5                   | 26.32 | 379 $\pm$ 27     | 59.50 | 25.2               |                      |
| 4                   | 21.05 | 290 $\pm$ 35     | 33.90 | 25.1               |                      |
| 3                   | 15.79 | 210 $\pm$ 29     | 15.96 | 22.8               |                      |
| 2                   | 10.53 | 100 $\pm$ 21     | 1.46  | 17.7               |                      |
| 1                   | 5.26  | 20 $\pm$ 4       | 0.19  | 113.2 <sup>1</sup> |                      |
| 0.5                 | 2.63  | 5.83 $\pm$ 4.54  | 0.17  | 138.3 <sup>1</sup> |                      |
| 0.3                 | 1.59  | 3.84 $\pm$ 1.15  | 0.16  | 109.6 <sup>1</sup> |                      |
| 0.1                 | 0.53  | 0.93 $\pm$ 0.20  | 0.16  | 127.1 <sup>1</sup> |                      |
| 0.06                | 0.32  | 0.88 $\pm$ 0.20  | 0.10  | 129.5 <sup>1</sup> |                      |
| 0.03                | 0.16  | 0.49 $\pm$ 0.20  | 0.05  | 130.5 <sup>1</sup> |                      |
| 0.02                | —     | 0.18; 0.31; 0.17 | —     | —                  |                      |
| 0.01                | —     | 0.34; 0.17; 0.37 | —     | —                  |                      |

<sup>1</sup> 0.1wt% DTAC with respective to solvent was added into the polymer solution.

**Table S2.** Parameters for the fitting of Figure 5.

| Model Equation | Cubic<br>$Y=a + bX + cX^2 + dX^3$<br>Value | Standard Error |
|----------------|--------------------------------------------|----------------|
| a              | 0.61948                                    | 0.19128        |
| b              | 0.08154                                    | 0.51573        |
| c              | 0.92149                                    | 0.1407         |
| d              | -0.01383                                   | 0.00478        |
